# Supplementary material
Source: publisher figshare collection journal article supplement (https://geolsoc.figshare.com/ndownloader/files/22758272)
Supplement: Supplementary file 1 [file 22758272]

## Sheet: Table 1
Locality: Melton Ross.					Mortimore	Hildreth	Wood et	Dodsworth		Wood &	Jeans et al.	Jeans et al.	Hart et al.	Jefferies
Lithostratigraphy and sampling.			This	paper	2014	1999	al. 1997	1996		Mortimore	1991	1991	1991 &	1963
(Not to scale.)										1995			1993
			Melton	Ross	S. Ferriby	Bigby	M. Ross	S.F./Flixton		M.R./S.F.	Flixton	S. Ferriby	S. Ferriby	S. Ferriby
Member	Lithology	Sample	Bed	Sub-unit
	limestone
		MR97-1	Bed H		gungy marl	Unit 8	Bed 10	Bed H		Bed 6		Bed 8	Bed v
		MR97-2	Bed G				Bed 9	Bed G			?15 to ?17	Bed 7
	light	MR97-3									Beds
	marl	MR97-4	Bed F			Unit 7	Bed 8	Bed F		Bed 5	11 to ?14	Bed 6	Bed iv	Bed iv
Flixton		MR97-5
Member		MR97-6
(Black	dark	MR97-7	Bed E				Bed 7c	Bed E			Bed 10
Band Sub-	marl	MR97-8
member)		MR97-8.5			Black
		MR97-9	Bed D		Band	Unit 6	Bed 7b	Bed D		Bed 4	Bed 9	Bed 5	Bed iii	Bed iii
		MR97-10		C3					C3		Bed 8
		MR97-10.5	Bed C	C2			Bed 7a	Bed C	C2		Bed 7
	dark	MR97-11		C1					C1		Bed 6
	marl	MR97-11.5
		MR97-12		B4		Unit 5	Bed 6b		(u)	Bed 3	Bed 5
	light				silty		Bed 6a
Flixton	marl	MR97-13	Bed B	B3	khaki	Unit 4	Bed 5b	Bed B		Bed 2	Bed 4	Bed 4	Bed ii	Bed ii
Member				B2	marl	Unit 3	Bed 5a		(l)
(Plenus				B1			Bed 4
Marls Sub-	limestone	MR97-14		A3 (CL)		Unit 2 (CL)	Bed 3 (CL)	lst		limestone		Bed 3 (lst)
member)			Bed A	A2		Unit 1	Bed 2	Bed A		Bed 1	Bed 3	Bed 2	Bed i	Bed i
				A1			Bed 1				Bed 2
		MR97-15 to 22	Beds I-VII				Beds I-VII			A. S.
Louth Mbr.	limestone	MR97-23				Ferriby Chalk Formation					Bed 1	Bed 1
Key: A.S. = 'Anomalous Succession'; CL, = 'Central Limestone'; lst = limestone (chalk); l = lower; u = upper.												= Stratigraphic break
Table 1. Lowermost part of the Welton Chalk Formation: A comparison of bed nomenclature.

## Sheet: Table 2
Locality: Melton Ross.
(Not to scale.)						Kerogen		Terrigenous palynomorphs						Marine palynomorphs
Lithostrat.	Lithology	Sample	Counts per	TOC	AOM	P'clasts	Palyn.	Gymnosp.	Pterido.	Angiosp.	T/M	P/G	Dinoflag.	Prasinoph.	Acantho.	Dinoflag.
			g (total)	%	%	%	%	%	%	%	ratio	ratio	%	%	%	diversity
	limestone
Bed H		MR97-1	34320	0.21	71	12	17	9.7	0.3	< 0.3	0.1	0.24	81.7	5.7	2.7		63
Bed G		MR97-2	89760	3.47	92	4	4	11	2.3	0.3	0.137	0.34	68.3	6.3	11.7		62
	light	MR97-3	6688	0.18	58	13	29	3	< 0.3	< 0.3	0.03	0.21	95.3	0.7	0.7		69
Bed F	marl	MR97-4	1470	0.12	9	49	42	< 0.3	< 0.3	0	0	0.31	98.7	1.3	0		53
		MR97-5	8668	0.34	41	33	26	2.7	< 0.3	0	0.027	0.16	96.3	0.7	0.3		67
		MR97-6	17204	0.4	42	30	28	5	1	0.3	0.063	0.25	91.3	1.3	0.7		79
Bed E	dark	MR97-7	30360	0.67	31	33	36	9.7	0.3	< 0.3	0.1	0.36	82.7	4.7	2.3		68
	marl	MR97-8	85184	2.18	83	8	9	9.7	2.6	< 0.3	0.123	0.32	77.3	6	4		71
		MR97-8.5	219648	2.74	71	11	18	12.3	0.3	< 0.3	0.127	0.35	82.7	1.7	2.7		72
Bed D		MR97-9	23518	0.36	19	30	51	< 0.3	0	0	0	0.03	100	0	0		63
		MR97-10	123024	2.19	81	5	10	10	0.3	0.3	0.107	0.29	86.7	1	1.7		72
Bed C		MR97-10.5	53284	0.7	27	29	44	0.3	0	< 0.3	0.003	0.04	99	0	0.3		65
	dark	MR97-11	101552	1.43	63	16	21	4	< 0.3	0.7	0.047	0.31	92.3	0.7	2.3		79
	marl	MR97-11.5	87296	2.2	71	15	14	7.3	< 0.3	0.3	0.077	0.35	90.7	0.7	1		76
Bed B		MR97-12	288	0.2				0.3	0	0	0.003	0.01	99.7	0	0		33
		MR97-13	28	0.12				1.4	0.4	0	0.018	0.06	96.5	0	0.7		33
Bed A	limestone	MR97-14	<1	0.1	No reliable kerogen												2
		MR97-15	0	0.15	counts from sample -12												0
Bed VII		MR97-16	<1	0.11	to sample -19, due to												1
	light	MR97-17	27	0.14	sparse recovery and			0	0	0	0	0	100	0	0		4
	marl	MR97-18	5	0.13	pyritic material.			0	0	0	0	0	100	0	0		1
Bed ?VI		MR97-18.5	8	0.21				0	0	0	0	0	100	0	0		2
Bed ?IV-V		MR97-19	88	0.14				0	0	0	0	0	100	0	0		1
Bed ?III		MR97-20	95	0.16	1	89	10	0.3	0	0	0.003	0.72	99.3	0.3	0		32
Bed II		MR97-21	12408	0.28	2	26	72	0.7	< 0.3	< 0.3	0.007	0.45	98.3	1	0		77
Bed I		MR97-22	53	0.12	4	90	6	1	0	0	0.01	0.66	97.3	1.7	0		33
	limestone	MR97-23	N/A	0.04
Table 2. Summary of palynomorph groups, > 10 micron kerogen counts and total organic carbon (TOC). Shaded rows highlight samples with > 1 % TOC.

## Sheet: Table 3
Locality: Melton Ross.
(Not to scale.)							Gonyaulacoid dinoflagellate cysts
Lithostrat.	Lithology	Sample	L. siphoniphorum		C. compactum-memb.		Pterodinium spp.		Spiniferites spp.		O. totum		Dinoflagell.? type D
			%	c.p.g.	%	c.p.g.	%	c.p.g.	%	c.p.g.	%	c.p.g.	%	c.p.g.
	limestone
Bed H		MR97-1	0	0	42.7	14655	0.7	240	6	2059	0	0	1.3	458
Bed G		MR97-2	0	0	11.7	10502	2.3	2064	9.3	8348	0	0	0.7	598
	light	MR97-3	0	0	13	869	10	669	28.3	1893	< 0.3	P	2	134
Bed F	marl	MR97-4	0	0	19.7	290	3.7	54	18.7	274	< 0.3	P	9	132
		MR97-5	0	0	21.7	1881	4	347	27.7	2401	0.7	58	4	347
		MR97-6	0	0	18	3097	3.7	637	22.3	3836	< 0.3	P	1.7	287
Bed E	dark	MR97-7	0	0	15.3	4645	3.7	1123	14.7	4463	0	0	1	304
	marl	MR97-8	0	0	15.7	13374	4	3407	16.7	14226	< 0.3	P	0.3	284
		MR97-8.5	0	0	23.3	51178	2.7	5930	9.3	20427	0	0	0.3	732
Bed D		MR97-9	0	0	35	8231	3.3	776	33	7761	1.3	306	1.3	314
		MR97-10	0	0	23.7	29157	3	3691	12	14763	< 0.3	P	0.3	410
Bed C		MR97-10.5	0	0	32.0	17050	4.7	2504	25.7	13694	0.3	158	0.7	355
	dark	MR97-11	0	0	16	16248	4	4062	25.4	25794	0.7	656	0.7	677
	marl	MR97-11.5	0	0	13	11348	5	4365	17.3	15102	3.3	2612	1	873
Bed B		MR97-12	? < 0.3	?P	13.7	39	< 0.3	P	< 0.3	1	40.3	116	16.3	47
		MR97-13	0	0	29.3	8	0	0	23.3	7	5	1	1.1	<1
Bed A	limestone	MR97-14	0	0	0	0	0	0	0	0	0	0	0	0
		MR97-15	0	0	0	0	0	0	0	0	0	0	0	0
Bed VII		MR97-16	0	0	0	0	0	0	0	0	0	0	50	<1
	light	MR97-17	0	0	0	0	0	0	0	0	0.4	1	98.1	26
	marl	MR97-18	0	0	0	0	0	0	0	0	0	0	100	5
Bed ?VI		MR97-18.5	0	0	0	0	0	0	0	0	0	0	94.7	8
Bed ?IV-V		MR97-19	0	0	0	0	0	0	0	0	0	0	100	88
Bed ?III		MR97-20	1.7	2	0.3	1	1	1	5.4	5	0	0	48	46
Bed II		MR97-21	2.7	335	< 0.3	P	4.7	583	29	3598	0	0	1	124
Bed I		MR97-22	1	1	0.3	1	4.3	2	13.3	7	0	0	3	2
	limestone	MR97-23
Table 3. Relative and absolute abundance of selected gonyaulacoid dinoflagellate cysts (G-cysts), and Dinoflagellate? type D of Ioannides (1986).

## Sheet: Table 4
Locality: Melton Ross.
(Not to scale.)							Peridinioid dinoflagellate cysts
Lithostrat.	Lithology	Sample	P. infusorioides		S. pontis-mariae		E. saxoniense		Bosedinia cf. sp. 1		T. suspectum		Ginginodinium? sp.A
			%	c.p.g.	%	c.p.g.	%	c.p.g.	%	c.p.g.	%	c.p.g.	%	c.p.g.
	limestone
Bed H		MR97-1	< 0.3	P	5	1716	4.7	1613	1	343	7	2402	1.7	583
Bed G		MR97-2	0.3	269	4	3590	8	7180	5.7	5116	3	2693	1	898
	light	MR97-3	11.3	756	3.3	221	1.7	114	0.3	20	2	134	0.7	47
Bed F	marl	MR97-4	9.3	137	5.7	84	1.7	25	0.3	4	4	59	0.3	4
		MR97-5	7.7	667	2.7	234	1.7	147	2	173	0.3	26	0	0
		MR97-6	9	1548	5.3	912	2.7	465	2	344	2	344	0.7	120
Bed E	dark	MR97-7	3.3	1002	8.7	2641	5.3	1609	5	1518	4.7	1427	1.7	516
	marl	MR97-8	3.7	3152	10.7	9115	2.3	1959	3	2556	2.7	2300	1	852
		MR97-8.5	1.7	3734	18.7	41074	2	4393	2.3	5052	2.3	5052	1.3	2855
Bed D		MR97-9	1	235	0.7	165	0.3	71	0	0	0.7	165	0	0
		MR97-10	1	1230	14.7	18085	1	1230	6	7381	1.7	2091	< 0.3	P
Bed C		MR97-10.5	1.3	693	< 0.3	P	0.3	160	0	0	1.7	906	0	0
	dark	MR97-11	5	5078	16.7	16959	0.7	711	1.3	1320	4	4062	0	0
	marl	MR97-11.5	3	2619	18.7	16324	1	872	2	1746	5	4365	0.3	262
Bed B		MR97-12	0	0	< 0.3	P	0	0	0	0	1	3	0	0
		MR97-13	3.2	9	0.7	1	0	0	0.4	1	1.1	1	0	0
Bed A	limestone	MR97-14	0	0	0	0	0	0	0	0	0	0	0	0
		MR97-15	0	0	0	0	0	0	0	0	0	0	0	0
Bed VII		MR97-16	0	0	0	0	0	0	0	0	0	0	0	0
	light	MR97-17	0	0	0	0	0	0	0	0	1.1	1	0	0
	marl	MR97-18	0	0	0	0	0	0	0	0	0	0	0	0
Bed ?VI		MR97-18.5	0	0	0	0	0	0	0	0	0	0	0	0
Bed ?IV-V		MR97-19	0	0	0	0	0	0	0	0	0	0	0	0
Bed ?III		MR97-20	13.3	13	17.7	17	0	0	0	0	1.3	1	0	0
Bed II		MR97-21	32	3971	10	1241	0	0	< 0.3	P	0.7	87	< 0.3	P
Bed I		MR97-22	13	7	41.3	22	?1	?1	0	0	2.3	1	0.3	1
	limestone	MR97-23
Table 4. Relative and absolute abundance of common/abundant peridinioid dinoflagellate cysts (P-cysts).

## Sheet: Suppl A
Locality: Melton Ross.
(Not to scale.)
Lithostrat.	Lithology	Sample	Mass on	TOC	HCl	HF	Schulze's	HNO3	KOH	KMnO4	Ultra-
			coverslip	(%)	0.35	0.4	solution	0.7	0.02		sonic
	limestone
Bed H		MR97-1	1/8g	0.21	Y	Y	30 min.		Rinse
Bed G		MR97-2	1/32g	3.47	Y	Y	18 hours		30 sec.		30 sec.
	light	MR97-3	1/2g	0.18	Y	Y
Bed F	marl	MR97-4	2.5g	0.12	Y	Y
		MR97-5	1/2g	0.34	Y	Y
		MR97-6	1/4g	0.4	Y	Y			Rinse
Bed E	dark	MR97-7	1/8g	0.67	Y	Y			Rinse
	marl	MR97-8	1/32g	2.18	Y	Y		18 hours	2 min.	2 min.	2 min.
		MR97-8.5	1/32g	2.74	Y	Y		18 hours	1 min.	1 min.	1 min.
Bed D		MR97-9	1/2g	0.36	Y	Y			Rinse
		MR97-10	1/16g	2.19	Y	Y		18 hours	2 min.	2 min.	2 min.
Bed C		MR97-10.5	1/4g	0.7	Y	Y
	dark	MR97-11	1/16g	1.43	Y	Y		24 hours	1 min.	1 min.	1 min.
	marl	MR97-11.5	1/16g	2.2	Y	Y		24 hours	1.5 min.	1.5 min.	1.5 min.
Bed B		MR97-12	2.5g	0.2	Y	Y
		MR97-13	10g	0.12	Y	Y		1 min.
Bed A	limestone	MR97-14	10g	0.1	Y	Y
		MR97-15	5g	0.15	Y	Y			Rinse
Bed VII		MR97-16	5g	0.11	Y	Y			Rinse
	light	MR97-17	10g	0.14	Y	Y		1 min.
	marl	MR97-18	5g	0.13	Y	Y		1 min.
Bed ?VI		MR97-18.5	5g	0.21	Y	Y			Rinse
Bed ?IV-V		MR97-19	5g	0.14	Y	Y
Bed ?III		MR97-20	5g	0.16	Y	Y		1 min.
Bed II		MR97-21	1g	0.28	Y	Y			Rinse
Bed I		MR97-22	5g	0.12	Y	Y
	limestone	MR97-23	N/A	0.04	N	N
Supplementary Table A. Palynological laboratory processing records.

## Sheet: Suppl B
Locality: Melton Ross.
(Not to scale.)
Lithostrat.	Lithology	Sample	Mass on	Coverslip count from 1 central traverse (1/44 of total area)						Est. c. slip	Counts per
			coverslip	A	B	C	D	av.	x44	/mass	g (total)
	limestone
Bed H		MR97-1	1/8g	99	110	118	63	97.5	4290	34320	34320
Bed G		MR97-2	1/32g	78	56	48	73	63.75	2805	89760	89760
	light	MR97-3	1/2g	103	67	71	63	76	3344	6688	6688
Bed F	marl	MR97-4	2.5g	75	92			83.5	3674	1470	1470
		MR97-5	1/2g	108	83	110	93	98.5	4334	8668	8668
		MR97-6	1/4g	100	81	107	103	97.75	4301	17204	17204
Bed E	dark	MR97-7	1/8g	100	95	76	74	86.25	3795	30360	30360
	marl	MR97-8	1/32g	54	61	52	75	60.5	2662	85184	85184
		MR97-8.5	1/32g	174	154	113	183	156	6864	219648	219648
Bed D		MR97-9	1/2g	234	210	283	342	267.25	11759	23518	23518
		MR97-10	1/16g	182	179	196	142	174.75	7689	123024	123024
Bed C		MR97-10.5	1/4g	300	282	348	281	302.75	13321	53284	53284
	dark	MR97-11	1/16g	123	179	165	110	144.25	6347	101552	101552
	marl	MR97-11.5	1/16g	134	152	119	91	124	5456	87296	87296
Bed B		MR97-12	2.5g	327 palynomorphs from 220 sq mm (484 sq mm coverslip)							288
		MR97-13	10g	Full count of 282							28
Bed A	limestone	MR97-14	10g	2 palynomorphs (possible contaminants) full count							<1
		MR97-15	5g	Barren sample							0
Bed VII		MR97-16	5g	2 questionable palynomorphs (possible contaminants) full count							<1
	light	MR97-17	10g	Full count of 265							27
	marl	MR97-18	5g	Full count of 25							5
Bed ?VI		MR97-18.5	5g	Full count of 38							8
Bed ?IV-V		MR97-19	5g	300 palynomorphs from 330 sq mm (484 sq mm coverslip)							88
Bed ?III		MR97-20	5g	238 palynomorphs from 242 sq mm (484 sq mm coverslip)							95
Bed II		MR97-21	1g	243	327	251	307	282	12408	12408	12408
Bed I		MR97-22	5g	263 palynomorphs from whole coverslip							53
	limestone	MR97-23	N/A
Supplementary Table B. Calculation of total concentration of palynomorphs (counts per gramme).

## Sheet: Suppl C
Locality: Melton Ross.
(Not to scale.)
Lithostrat.	Lithology	Sample	Counts per	T/M total	T/M ratio	Terrigen.	Dino total	Dinofl.	Prasinoph.	Prasinoph.	Acantho.	Acantho.	FTL	Algae
			g (total)			c.p.g.		c.p.g.	total	c.p.g.	total	c.p.g.	c.p.g.	c.p.g.
	limestone
Bed H		MR97-1	34320	30/270	0.111	3432	245/300	28028	17/300	1945	8/300	915
Bed G		MR97-2	89760	41/259	0.158	12267	205/300	61336	19/300	5685	35/300	10472
	light	MR97-3	6688	9/291	0.031	201	286/300	6376	2/300	45	2/300	44	22
Bed F	marl	MR97-4	1470	0/300	0	0	296/300	1450	4/300	20	0/300	0
		MR97-5	8668	8/292	0.027	231	289/300	8350	2/300	58	1/300	29
		MR97-6	17204	19/281	0.068	1090	274/300	15713	4/300	229	2/300	115		57
Bed E	dark	MR97-7	30360	30/270	0.111	3036	248/300	25098	14/300	1417	7/300	708		101
	marl	MR97-8	85184	37/263	0.141	10506	232/300	65876	18/300	5111	12/300	3407		284
		MR97-8.5	219648	38/262	0.145	27822	248/300	181576	5/300	3661	8/300	5857		732
Bed D		MR97-9	23518	0/300	0	0	300/300	23518	0/300	0	0/300	0
		MR97-10	123024	32/268	0.119	13123	260/300	106621	3/300	1230	5/300	2050
Bed C		MR97-10.5	53284	1/299	0.003	178	297/300	52751	0/300	0	1/300	178	177
	dark	MR97-11	101552	14/286	0.049	4739	277/300	93766	2/300	677	7/300	2370
	marl	MR97-11.5	87296	23/277	0.083	6693	272/300	79148	2/300	582	3/300	873
Bed B		MR97-12	288	1/299	0.003	1	299/300	287	0/300	0	0/300	1
		MR97-13	28	8/274	0.029	< 1	272/282	27	0/282	0	2/282	1
Bed A	limestone	MR97-14	< 1
		MR97-15	0				Palynologically barren interval
Bed VII		MR97-16	< 1
	light	MR97-17	27	0/265	0	0	265/265	27	0/265	0	0/265	0
	marl	MR97-18	5	0/25	0	0	25/25	5	0/25	0	0/25	0
Bed ?VI		MR97-18.5	8	0/37	0	0	37/37	8	0/37	0	0/37	0
Bed ?IV-V		MR97-19	88	0/300	0	0	300/300	88	0/300	0	0/300	0
Bed ?III		MR97-20	95	1/299	0.003	< 1	298/300	94	1/300	1	0/300	0
Bed II		MR97-21	12408	2/298	0.007	83	295/300	12201	3/300	124	0/300	0
Bed I		MR97-22	53	3/297	0.01	< 1	292/300	52	5/300	1	0/300	0
	limestone	MR97-23
Supplementary Table C. Concentration (counts per gramme) calculation for different palynomorph groups.

## Sheet: Suppl D
Locality: Melton Ross.
(Not to scale.)										Kerogen (> 10 microns) - %
Lithostrat.	Lithology	Sample	Total	P-cysts	G-cysts	P/G	Other		Phytoclasts			AOM	Palynom.
			dinofl.	count	count	ratio	dinofl.	Opaque	Translucent	Queried	Total
	limestone
Bed H		MR97-1	245/300	58	179	0.24	8	9	3		12	71	17
Bed G		MR97-2	205/300	66	129	0.34	10	2	2		4	92	4
	light	MR97-3	286/300	58	218	0.21	10	9	4		13	58	29
Bed F	marl	MR97-4	296/300	94	166	0.31	36	14	26	9	49	9	42
		MR97-5	289/300	43	229	0.16	17	15	18		33	41	26
		MR97-6	274/300	65	200	0.25	9	14	13	3	30	42	28
Bed E	dark	MR97-7	248/300	86	154	0.36	8	16	13	4	33	31	36
	marl	MR97-8	232/300	73	154	0.32	5	4	3	1	8	83	9
		MR97-8.5	248/300	85	155	0.35	8	6	5		11	71	18
Bed D		MR97-9	300/300	8	282	0.03	10	17	12	1	30	19	51
		MR97-10	260/300	74	177	0.29	9	4	4	1	5	81	10
Bed C		MR97-10.5	297/300	10	275	0.04	12	13	8	8	29	27	44
	dark	MR97-11	277/300	83	189	0.31	5	10	5	1	16	63	21
	marl	MR97-11.5	272/300	92	171	0.35	9	11	4		15	71	14
Bed B		MR97-12	299/300	3	221	0.01	75
		MR97-13	272/282	15	250	0.06	7
Bed A	limestone	MR97-14
		MR97-15		Palynologically barren interval				No reliable kerogen counts from sample -12 to sample -19, due
Bed VII		MR97-16						to sparse recovery and pyritic material.
	light	MR97-17	265/265	3	2		260
	marl	MR97-18	25/25				25
Bed ?VI		MR97-18.5	37/37		1		36
Bed ?IV-V		MR97-19	300/300				300
Bed ?III		MR97-20	298/300	97	38	0.72	163	26	63		89	1	10
Bed II		MR97-21	295/300	128	154	0.45	13	17	9		26	2	72
Bed I		MR97-22	292/300	172	90	0.66	30	18	72		90	4	6
	limestone	MR97-23
Supplemetary Table D. Calculation of dinoflagellate cyst P/G ratio, and kerogen count records.

## Sheet: Suppl E
Locality: Melton Ross.
(Not to scale.)
Lithostrat.	Lithology	Sample	c.p.g.	Terrest.	Terrigen.	Gymnosp.	Gymnosp.	Pteridoph.	Pteridoph.	Angiosp.	Angiosp.
			(total)	total %	c.p.g.	%	c.p.g.	%	c.p.g.	%	c.p.g.
	limestone
Bed H		MR97-1	34320	10	3432	9.7	3329	0.3	103	< 0.3	P
Bed G		MR97-2	89760	13.7	12267	11	9874	2.3	2094	0.3	299
	light	MR97-3	6688	3	201	3	201	< 0.3	P	< 0.3	P
Bed F	marl	MR97-4	1470	< 0.3	0	< 0.3	P	< 0.3	P	0	0
		MR97-5	8668	2.7	231	2.7	231	< 0.3	P	0	0
		MR97-6	17204	6.3	1090	5	860	1	172	0.3	58
Bed E	dark	MR97-7	30360	10	3036	9.7	2935	0.3	101	< 0.3	P
	marl	MR97-8	85184	12.3	10506	9.7	8234	2.6	2272	< 0.3	P
		MR97-8.5	219648	12.7	27822	12.3	27090	0.3	732	< 0.3	P
Bed D		MR97-9	23518	< 0.3	0	< 0.3	P	0	0	0	0
		MR97-10	123024	10.7	13123	10	12303	0.3	410	0.3	410
Bed C		MR97-10.5	53284	0.3	178	0.3	178	0	0	< 0.3	P
	dark	MR97-11	101552	4.7	4739	4	4062	< 0.3	P	0.7	677
	marl	MR97-11.5	87296	7.7	6693	7.3	6402	< 0.3	P	0.3	291
Bed B		MR97-12	288	0.3	1	0.3	1	0	0	0	0
		MR97-13	28	1.8	< 1	1.4	P	0.4	P	0	0
Bed A	limestone	MR97-14	<1
		MR97-15	0
Bed VII		MR97-16	<1
	light	MR97-17	27	0	0	0	0	0	0	0	0
	marl	MR97-18	5	0	0	0	0	0	0	0	0
Bed ?VI		MR97-18.5	8	0	0	0	0	0	0	0	0
Bed ?IV-V		MR97-19	88	0	0	0	0	0	0	0	0
Bed ?III		MR97-20	95	0.3	< 1	0.3	P	0	0	0	0
Bed II		MR97-21	12408	0.7	83	0.7	83	< 0.3	P	< 0.3	P
Bed I		MR97-22	53	1	< 1	1	P	0	0	0	0
	limestone	MR97-23	N/A
Supplementary Table E. Calculation of concentration of terrigenous palynomorph groups (note that 'P' = Present, not quantified).

## Sheet: Suppl F
Supplementary Table F (1/2). Palynological slides curated in the MPA and MPK collections of the BGS.
		Slide				England Finder
BGS Slide No	Sample	number	Slide label			holotype reference
MPA 70686	MR97-1	1	MR-1(A) KEROGEN
MPA 70687	MR97-1	2	MR-1(B) KEROGEN
MPA 70688	MR97-1	3	MR-1(C) KEROGEN
MPA 70689	MR97-1	4	MR-1(D) KEROGEN
MPA 70690	MR97-1	5	MR-1(A)
MPA 70691	MR97-1	6	MR-1(B)
MPA 70692	MR97-1	7	MR-1(C)
MPA 70693	MR97-1	8	MR-1(D)
MPA 70694	MR97-2	9	MR-2(A) KEROGEN
MPA 70695	MR97-2	10	MR-2(B) KEROGEN
MPA 70696	MR97-2	11	MR-2(A)
MPA 70697	MR97-2	12	MR-2(B)
MPA 70698	MR97-2	13	MR-2(C)
MPA 70699	MR97-2	14	MR-2(D)			Trithyrodinium maculatum
MPA 71640	MR97-3	15	MR-3(A) KEROGEN			S32/3	MPK 14662
MPA 70700	MR97-3	16	MR-3(B) KEROGEN
MPA 70701	MR97-3	17	MR-3(C) KEROGEN
MPA 70702	MR97-3	18	MR-3(D) KEROGEN
MPA 70703	MR97-4	19	MR-4(A) KEROGEN
MPA 70704	MR97-4	20	MR-4(B) KEROGEN
MPA 70705	MR97-5	21	MR-5 KEROGEN
MPA 70706	MR97-5	22	MR-5(A)
MPA 70707	MR97-5	23	MR-5(B)
MPA 70708	MR97-5	24	MR-5(C)
MPA 70709	MR97-5	25	MR-5(D)
MPA 70710	MR97-6	26	MR-6 KEROGEN
MPA 70711	MR97-6	27	MR-6(A)
MPA 70712	MR97-6	28	MR-6(B)
MPA 70713	MR97-6	29	MR-6(C)
MPA 70714	MR97-6	30	MR-6(D)
MPA 70715	MR97-7	31	MR-7 KEROGEN
MPA 70716	MR97-7	32	MR-7(A)
MPA 70717	MR97-7	33	MR-7(B)
MPA 70718	MR97-7	34	MR-7(C)
MPA 70719	MR97-7	35	MR-7(D)
MPA 70720	MR97-8	36	MR-8 KEROGEN
MPA 70721	MR97-8	37	MR-8(A)
MPA 70722	MR97-8	38	MR-8(B)
MPA 70723	MR97-8	39	MR-8(C)
MPA 70724	MR97-8	40	MR-8(D)
MPA 70725	MR97-8.5	41	MR-8.5(A) KEROGEN
MPA 70726	MR97-8.5	42	MR-8.5(B) KEROGEN
MPA 70727	MR97-8.5	43	MR-8.5(A)
MPA 70728	MR97-8.5	44	MR-8.5(B)
MPA 70729	MR97-8.5	45	MR-8.5(C)
MPA 70730	MR97-8.5	46	MR-8.5(D)
MPA 70731	MR97-9	47	MR-9 KEROGEN
Supplementary Table F (2/2). Palynological slides curated in the MPA and MPK collections of the BGS.
MPA 70732	MR97-9	48	MR-9(A)
MPA 70733	MR97-9	49	MR-9(B)
MPA 70734	MR97-9	50	MR-9(C)
MPA 70735	MR97-9	51	MR-9(D)
MPA 70736	MR97-10	52	MR-10 KEROGEN
MPA 70737	MR97-10	53	MR-10(A)
MPA 70738	MR97-10	54	MR-10(B)
MPA 70739	MR97-10	55	MR-10(C)
MPA 70740	MR97-10	56	MR-10(D)
MPA 70741	MR97-10.5	57	MR-10.5(A) KER.
MPA 70742	MR97-10.5	58	MR-10.5(B) KER.
MPA 70743	MR97-10.5	59	MR-10.5(C) KER.
MPA 70744	MR97-10.5	60	MR-10.5(D) KER.
MPA 70745	MR97-11	61	MR-11 KEROGEN
MPA 70746	MR97-11	62	MR-11(A)			Canninginopsis? lindseyensis
MPA 71641	MR97-11	63	MR-11(B)			P44/3	MPK 14663
MPA 70747	MR97-11	64	MR-11(C)
MPA 70748	MR97-11	65	MR-11(D)
MPA 70749	MR97-11.5	66	MR-11.5 KEROGEN
MPA 70750	MR97-11.5	67	MR-11.5(A)
MPA 70751	MR97-11.5	68	MR-11.5(B)
MPA 70752	MR97-11.5	69	MR-11.5(C)
MPA 70753	MR97-11.5	70	MR-11.5(D)
MPA 70754	MR97-12	71	MR-12(A) KER.
MPA 70755	MR97-12	72	MR-12(B) KER.
MPA 70756	MR97-12	73	MR-12(C) KER.
MPA 70757	MR97-12	74	MR-12(D) KER.
MPA 70758	MR97-12	75	MR-12 'Heavies' from swirl
MPA 70759	MR97-13	76	MR-13
MPA 70760	MR97-13	77	MR-13 'Heavies' from swirl
MPA 70761	MR97-14	78	MR-14 KER.
MPA 70762	MR97-15	79	MR-15(A)
MPA 70763	MR97-15	80	MR-15(B)
MPA 70764	MR97-16	81	MR-16(A)
MPA 70765	MR97-16	82	MR-16(B)
MPA 70766	MR97-17	83	MR-17
MPA 70767	MR97-18	84	MR-18(A)
MPA 70768	MR97-18	85	MR-18(B)
MPA 70769	MR97-18.5	86	MR-18.5(A)
MPA 70770	MR97-18.5	87	MR-18.5(B)
MPA 70771	MR97-20	88	MR-20(A)
MPA 70772	MR97-20	89	MR-20(B)
MPA 70773	MR97-21	90	MR-21(A)
MPA 70774	MR97-21	91	MR-21(B)
MPA 70775	MR97-21	92	MR-21(C)
MPA 70776	MR97-21	93	MR-21(D)
MPA 70777	MR97-22	94	MR-22(A)
MPA 70778	MR97-22	95	MR-22(B)
MPA 71642	MR97-11	96	MR-11(E)

[truncated: 4 more sheets: Suppl G, Suppl H, Suppl I, Suppl J]
